1 **Expanded Distribution and Predicted Suitable Habitat for the Critically Endangered**  
2 **Yellow-tailed Woolly Monkey (*Lagothrix flavicauda*) in Peru**

3

4 Melissa A. Zarate<sup>1,2</sup>, Sam Shane<sup>3,4</sup>, Elvis Charpentier<sup>5</sup>, Yeissy Sarmiento<sup>4</sup>, and Christopher A.  
5 Schmitt<sup>1,2</sup>

6

7 <sup>1</sup>Department of Anthropology, College of Arts and Sciences, Boston University, Boston, MA USA

8 <sup>2</sup>Department of Biology, College of Arts and Sciences, Boston University, Boston, MA USA

9 <sup>3</sup>Neotropical Primate Conservation, Windrush, Looe Hill, Seaton, Cornwall, UK

10 <sup>4</sup>Asociación Neotropical Primate Conservation Perú, Jr Andalucía #373, Moyobamba, San Martín,  
11 Perú

12 <sup>5</sup>Equipo Primatológico del Perú, Calle Internacional M-43, Iquitos, Maynas, Perú

13

14 Corresponding authors' emails: [mazarate@bu.edu](mailto:mazarate@bu.edu); [caschmit@bu.edu](mailto:caschmit@bu.edu)

15 Address: Department of Anthropology, Boston University

16 232 Bay State Road

17 Boston, MA 02215 USA

18

19 Submission date: 5/19/22

20

21

22

23

24 ABSTRACT

25           The Tropical Andes Biodiversity Hotspot holds a remarkable number of species at risk of  
26 extinction due to anthropogenic habitat loss, hunting and climate change. One of these species, the  
27 Critically Endangered yellow-tailed woolly monkey (*Lagothrix flavicauda*), was recently sighted  
28 in Junín region, 206 kilometres south of its previously known distribution. The range extension,  
29 combined with continued habitat loss, calls for a re-evaluation of the species' distribution and  
30 available suitable habitat. Here, we present novel data from surveys at 53 sites in the regions of  
31 Junín, Cerro de Pasco, Ayacucho and Cusco. We encountered *L. flavicauda* at 9 sites, all in Junín,  
32 and the congeneric *L. l. tschudii* at 20 sites, but never in sympatry. Using these new localities along  
33 with all previous geographic localities for the species, we made predictive Species Distribution  
34 Models based on Ecological Niche Modelling using a generalized linear model and maximum  
35 entropy. Each model incorporated bioclimatic variables, forest cover, vegetation measurements,  
36 and elevation as predictor variables. Model evaluation showed >80% accuracy for all measures.  
37 Precipitation was the strongest predictor of species presence. Habitat suitability maps illustrate  
38 potential corridors for gene flow between the southern and northern populations, although much  
39 of this area is inhabited by *L. l. tschudii*. An analysis of the current protected area (PA) network  
40 showed ~47% of remaining suitable habitat is unprotected. With this, we suggest priority areas for  
41 new protected areas or expansions to existing reserves that would conserve potential corridors  
42 between *L. flavicauda* populations. Further surveys and characterization of the distribution in  
43 intermediate areas, combined with studies on genetic flow, are still needed to protect this species.

44

45 Key Words (7/8 used): *Oreonax*, Maxent, Generalized Linear Modelling, Conservation, Species  
46 Distribution Modelling (SDM), Range Expansion

47

## 48 **Introduction**

49       Changes in species' distributions are of major concern for conservationists due to the  
50 continual expansion of human populations and land use (Hansen *et al.* 2001; Newbold *et al.* 2014;  
51 Dai *et al.* 2021) that shift, contract, or fragment a species' geographic range. Such altered ranges  
52 may isolate populations, enhancing the likelihood of inbreeding depression or local extinction  
53 (Ewers and Didham 2005; Calkins *et al.* 2021; Solórzano-García *et al.* 2021). Information on the  
54 relative distributions of different populations of a species can reveal what types of landscapes or  
55 species community composition—in the case of competitive exclusion—act as geographic or  
56 ecological barriers to gene flow (Case and Taper 2000; Blair and Melnick 2012; Sales *et al.* 2019;  
57 Pázstor *et al.* 2020). To conserve natural biodiversity in the face of expanding land use by humans,  
58 conservation management must operate on a landscape scale, understanding species-ecosystem  
59 relationships and species' responses to habitat change (Bellamy *et al.* 2013; Robillard *et al.* 2015;  
60 Xioa *et al.* 2019). Informed management planning involves understanding the true current  
61 distribution of a species and the necessary habitat components to predict how distribution changes  
62 will occur in the future, and the best possible options for area protection.

63       The yellow-tailed woolly monkey (*Lagothrix flavicauda*) is considered Critically  
64 Endangered and amongst the most threatened primate species in the world (Mittermeier *et al.* 2012;  
65 Shanee *et al.* 2021), making it a key focus of conservation initiatives in northern Peru (Shanee *et*  
66 *al.* 2018). The Tropical Andes Biodiversity Hotspot (TABH), to which the species is endemic, is  
67 among the top five hotspots predicted to lose the most biological diversity due to continued  
68 anthropogenic activities (Brooks *et al.* 2002). In northern Peru, the greatest threat to species and  
69 habitats in the TABH is habitat destruction for cattle ranching, logging, and other, mainly small

70 scale, economic activities, fuelled by a growing human population and aided by the construction  
71 of highways and incentivized access to lands (Oliveira *et al.* 2007; Shanee 2011; Shanee 2012;  
72 Programa Bosques 2015; GIZ 2016; Laurance 2018; Shanee and Shanee 2016). With this migrant  
73 economic development, roads are continuously built to access new areas, creating a cycle of  
74 increasing deforestation for the extraction of resources and settlement (Gallice, Larrea-Gallegos  
75 and Vázquez-Rowe 2019). Hunting of primates for bushmeat and the pet trade is also putting *L.*  
76 *flavicauda* and other species at further risk (Shanee 2011; Shanee 2012; Shanee *et al.* 2017).

77         The geographic range of *L. flavicauda* – long thought to be restricted to the northern regions  
78 of Amazonas and San Martín and neighbouring areas of Huánuco, La Libertad, and Loreto – has  
79 been continuously re-evaluated through survey efforts (Mittermeier, de Macedo-Ruiz, Luscombe  
80 1975; Graves *et al.* 1980; Leo Luna 1980; Parker and Barkley 1981; Butchart *et al.* 1995; Shanee  
81 *et al.* 2007; Shanee 2016; Shanee 2011). Recent observations in the region of Huánuco have found  
82 *L. flavicauda* populations as far as the south eastern border with the region of Pasco (Aquino *et al.*  
83 2015; Aquino, Garcia and Charpentier 2016). Camera trap observations led to the discovery of a  
84 new population of *L. flavicauda* in 2018 (McHugh *et al.* 2020). This new population, in the  
85 Inchatoshi Kametsha Conservation Concession, Junín, is about 206 km south of the previously  
86 known southern range limit for the species (McHugh *et al.* 2020), with no sightings in intermediate  
87 areas.

88         *Lagothrix flavicauda* is generally restricted to montane forests between 1,400 to 2,800 m  
89 above sea level (m.a.s.l.) along the eastern slopes of the Andes (Aquino *et al.* 2017, Shanee 2011),  
90 with occasional occurrences below this elevation (Allgas *et al.* 2014; Paterson and Lopez Wong  
91 2014). Their preferred habitat depends on local climate and forest composition (Shanee 2016;  
92 Almeyda-Zambrano *et al.* 2019), and they are able to survive at least for a time in moderately

93 disturbed habitats when hunting pressure is low (Aquino *et al.* 2015; Shanee and Shanee 2015).  
94 This may be, in part, due to a flexible diet consisting of flowers, leaf petioles, epiphytic roots,  
95 vertebrates, and soil, although they are predominantly frugivorous. Fruits make up almost half of  
96 their dietary intake, which is dominated by a handful of species and genera with large fleshy fruits  
97 (Shanee and Shanee 2011, Shanee 2014; Fack *et al.* 2018), making food tree density and phenology  
98 important factors for sustaining viable populations. Previous studies suggest that the protected area  
99 (PA) network in northern Peru is insufficient to protect *L. flavicauda* from the consequences of  
100 human population growth, habitat degradation, and climate change (Buckingham and Shanee  
101 2009; Shanee 2016). As the number of PAs in Peru change, along with our knowledge of primate  
102 species distributions, it is critical to re-assess their coverage with current data.

103         Many conservation and research initiatives use *L. flavicauda* as a flagship species in Peru  
104 (Shanee *et al.* 2018). Although these have led to an increasing number of private, communal, and  
105 state PAs within the species distribution (Shanee *et al.* 2017; Shanee *et al.* 2020), they have  
106 predominantly focused on populations in Amazonas and San Martín (Shanee and Shanee 2015).  
107 Field surveys are vital to determining the species' distribution and habitat preferences outside these  
108 well-studied regions; however, they are often expensive, time consuming, and can be unfeasible  
109 depending on the terrain, access, and public order limitations (Young 1996; Shanee and Shanee  
110 2016). Predictive species distribution modelling (SDM) can highlight optimal areas for field  
111 surveys through comparison of the ecological conditions found within a given species' known  
112 range, with those across a wider area, showing where conditions are most favourable for the  
113 species presence (Phillips, Anderson and Schapire 2006; Ramirez-Villegas *et al.* 2014; Guisan,  
114 Thuiller and Zimmerman, 2017).

115 Species' distributions are predicated on three main conditions: the species must have the  
116 means to disperse into and out of a habitat, the habitat must have the correct combination of  
117 environmental variables to make it suitable, and the abiotic conditions must be able to maintain  
118 necessary species interactions (Guisan *et al.* 2017). SDM considers the second condition by using  
119 known habitat parameters to determine which are most important to the distribution of the focal  
120 species, and uses them to locate potentially suitable habitat (Dong *et al.* 2019; Cianfranni *et al.*  
121 2010; Liu *et al.* 2019). Such modeling may be used to prioritize search efforts when financial or  
122 human resources are not available for surveying a region of interest in person. For endangered  
123 species, analyzing correlations between these variables and known species occurrences can  
124 highlight conditions which the species requires for its long-term survival in the region of interest,  
125 and can be used to develop more effective conservation strategies. With this, conservationists can  
126 determine why a species may not be present in a particular area (Liu *et al.* 2019) or increase  
127 research and conservation effort in areas that appear to be suitable (LaRue and Nielsen 2008).

128 Here we compare the results of two SDM approaches—Generalized Linear Modelling  
129 (GLM) and Maximum Entropy (MaxEnt)—using the results of our recent field surveys in central  
130 and southern Peru. We created SDMs combining these novel localities with all previous records  
131 to create the most complete SDM for the species to date. We use the results of these approaches to  
132 highlight remaining suitable *L. flavicauda* habitat, particularly in its less-studied southern range.  
133 Finally, we evaluate the current Peruvian PA network's coverage of suitable habitat within the  
134 species' distribution, noting priority areas for new PAs, conservation corridors, and future surveys  
135 between the northern and recently-discovered Junín populations.

136

137 **Methods**

138

### 139 *Population Surveys*

140           We conducted five surveys between May 2019 and May 2021. Due to Covid-19 related  
141 travel restriction, no surveys were conducted between May and December 2020, with the May  
142 2020 survey being cut short due to implementation of national quarantine measures. Surveys were  
143 carried out in the regions of Ayacucho, Cerro de Pasco, Cusco, and Junín. Survey sites were  
144 selected based on preliminary MaxEnt models which used previously published localities, and  
145 updated with new sightings as the study progressed, with sites selected considering access routes,  
146 land ownership and researcher safety.

147           Survey efforts followed methods of previous surveys for the species (Shanee 2011). We  
148 gathered locality data along existing trail systems with local residents as field guides. Occasionally  
149 new trails were opened to enter new areas; however, this was typically avoided to minimize habitat  
150 disturbance. We visited sites for 2-9 days, with effort determined by available habitat size, and the  
151 possibility of *L. flavicauda* being found or confirmation of its presence. We recorded localities and  
152 points of visual or audio detection of all primates with a handheld GPS. We also gathered  
153 secondary evidence from local informants in and around the areas visited. Using images and verbal  
154 descriptions of *Lagothrix* spp. we cross-referenced information from multiple informants at each  
155 site.

156

### 157 *Species Distribution Modelling*

158           We selected two standard SDM methods— GLM and MaxEnt. To avoid overestimation of  
159 suitable habitat, we limited prediction outputs to between -80° W and -65° W, and -5° S and -15°  
160 S. We filtered this to only include areas between 1,000 and 3,500 m.a.s.l., i.e., within the species'

161 altitudinal range, which includes the entirety of the eastern slopes of the Peruvian Andes. Models  
162 used presence points from our own surveys combined with localities from recent published studies,  
163 i.e.,  $\leq 10$  years (Shanee 2011; Allgas *et al.* 2015; Aquino *et al.* 2016; Aquino *et al.* 2017; McHugh  
164 *et al.* 2020), and an additional six localities from the Global Biodiversity Information Facility  
165 (GBIF Secretariat 2021) (Fig. 1; Table S1).

166 Environmental data were all from publicly available sources (Table S2). We used the 19  
167 bioclimatic variables from *WorldClim2*, available in the R package raster v. 3.1-5 (Hijmans *et al.*  
168 2020) and elevation data from the NASA Shuttle Radar Topography Mission (SRTM; v. 4) at 30-  
169 meter resolution. We used forest cover data from the Global Forest Change (v. 1.7) dataset of  
170 percent tree cover from the year 2000, in which tree cover is given as a gradient of percentage  
171 canopy connectivity per 30 m pixel for vegetation taller than 5 m. Forest loss and gain between  
172 the years 2000 and 2018 were also analyzed, but were excluded from the model due to an  
173 insufficient number of areas experiencing any recorded loss or gain (fewer than 10 pixels within  
174 the study region, which did not coincide with the location of any presence points). We also used  
175 the Vegetation Health Product (VHP) dataset, at 1 km resolution, from the NOAA Centre for  
176 Satellite Applications and Research, which has been created from an algorithm providing estimates  
177 of moisture, thermal, and wind conditions in combination with infrared imaging to achieve an  
178 estimate of vegetation conditions in response to weather impacts. All data layers were re-sampled  
179 to 30 m resolution.

180

### 181 *Generalized Linear Model*

182 All GLMs were evaluated in R (v. 3.5.2; R Core Team 2018). We modelled the ecological  
183 niche of *L. flavicauda* as a binomial response variable of presence/pseudoabsence using a binomial



184 variance and logistic link function. We randomly selected pseudoabsence points to counter  
185 sampling bias from the lack of absence data existing for the species using the *randomPoints*  
186 function in the *dismo* package v.1.1-4 (Hijmans *et al.* 2017), generating 355 in the study area  
187 within an elevation mask including only areas within the altitudinal range. All presence points  
188 were excluded from the background point extraction process. We then extracted and standardized  
189 values from all environmental layers at each pseudoabsence and presence point to be used in the  
190 models. Models were built excluding correlated predictor variables based on Pearson's  $r$  value ( $\pm$   
191 0.75). Our final model was selected using the corrected Akaike Information Criterion (AICc)  
192 procedure (Akaike 1973; Hurvich and Tsai 1993).

193 We evaluated the predictive ability of our model using the area under the ROC curve  
194 (AUC), which summarizes model accuracy by giving the probability that the model ranks random  
195 presence sites over pseudoabsence sites. We calculated the AUC by building the models from a  
196 training set, and then applying it to the remainder of the data as a test set to evaluate predictive  
197 performance (Fielding and Bell 1997; Hirzel *et al.* 2006). Due to the relatively small number of  
198 presence points, we bootstrapped this process 1000 times using multiple distributions of presence  
199 data in the training and testing sets (Hein *et al.* 2007; Guisan *et al.* 2017). We also tested model  
200 accuracy using Cohen's kappa statistic and percent accuracy from a confusion matrix as a  
201 threshold-dependent method of evaluation (Guisan *et al.* 2017). Using training and test data, we  
202 set a probability threshold so that any point with a presence probability of 0.4 or higher was marked  
203 as a presence when establishing a confusion matrix of model predictions. The kappa statistic value  
204 ranges from -1 (complete disagreement between predicted and actual values) to 0 (predictions  
205 equated to random chance), to +1 (complete agreement with actual values).

206

207 *Maximum Entropy Model*

208         The MaxEnt model was created and evaluated in MaxEnt Programming Software (v. 3.4.4;  
209 Phillips 2006) and re-evaluated in R. We applied default settings to our MaxEnt run, with the  
210 following exceptions: background predictions were written for evaluation and mapping purposes  
211 and we selected a random test percentage of 25% of our presence points. We used the same non-  
212 correlated variables as in the GLM. MaxEnt measures variable contribution by permutation  
213 importance determined by randomly permuting the values of each variable among the training  
214 points, measuring the resulting decrease in training AUC, and normalizing these values to give a  
215 percentage (Phillips *et al.* 2006). MaxEnt evaluates the model using a ROC curve and calculating  
216 the model AUC. We corroborated the given value by bootstrapping the AUC calculation 1000  
217 times in R using the background prediction values.

218

219 *Suitable Habitat Classification and Protected Area Assessment*

220         To assess habitat suitability, we assigned habitat based on the predicted probability of  
221 species presence to categories of “Good” (P(robability of species presence) between 0.25 and  
222 0.75), “Very Good” (P>0.75), and “Low” (P<0.25), with “Good” and “Very Good” being  
223 considered suitable habitat. To incorporate the probable impact of hunting into our results, we  
224 considered habitat within 1 km of human settlement to have high hunting pressure for *L. flavicauda*  
225 (Shanee 2016). We used data from Humanitarian OpenStreetMap Team (2020) to distinguish  
226 human settlements, and deemed any suitable habitat within a 1 km buffer of settlement as low  
227 suitability. We overlaid the suitable habitat predicted by both models to find where the predictions  
228 intersected. Finally, we conducted an analysis of the PA coverage of suitable *L. flavicauda* habitat  
229 by overlaying the Peruvian PA network from the World Database of Protected Areas (WDPA;

230 UNEP-WCMC 2020) with the habitat predictions and calculated the percent of habitat that was  
231 considered Good or Very Good within the network. This was repeated with the network of non-  
232 governmental conservation concessions in Peru, downloaded from the National Forestry Service  
233 (SERFOR), as these concessions are not included in the WDPA files.

234

#### 235 *Data Accessibility*

236 All open-source data used for modelling are openly accessible via the links provided in  
237 the references. Presence data, prediction results, and all code can be found at  
238 <https://doi.org/10.5061/dryad.dz08kps0g>.

239

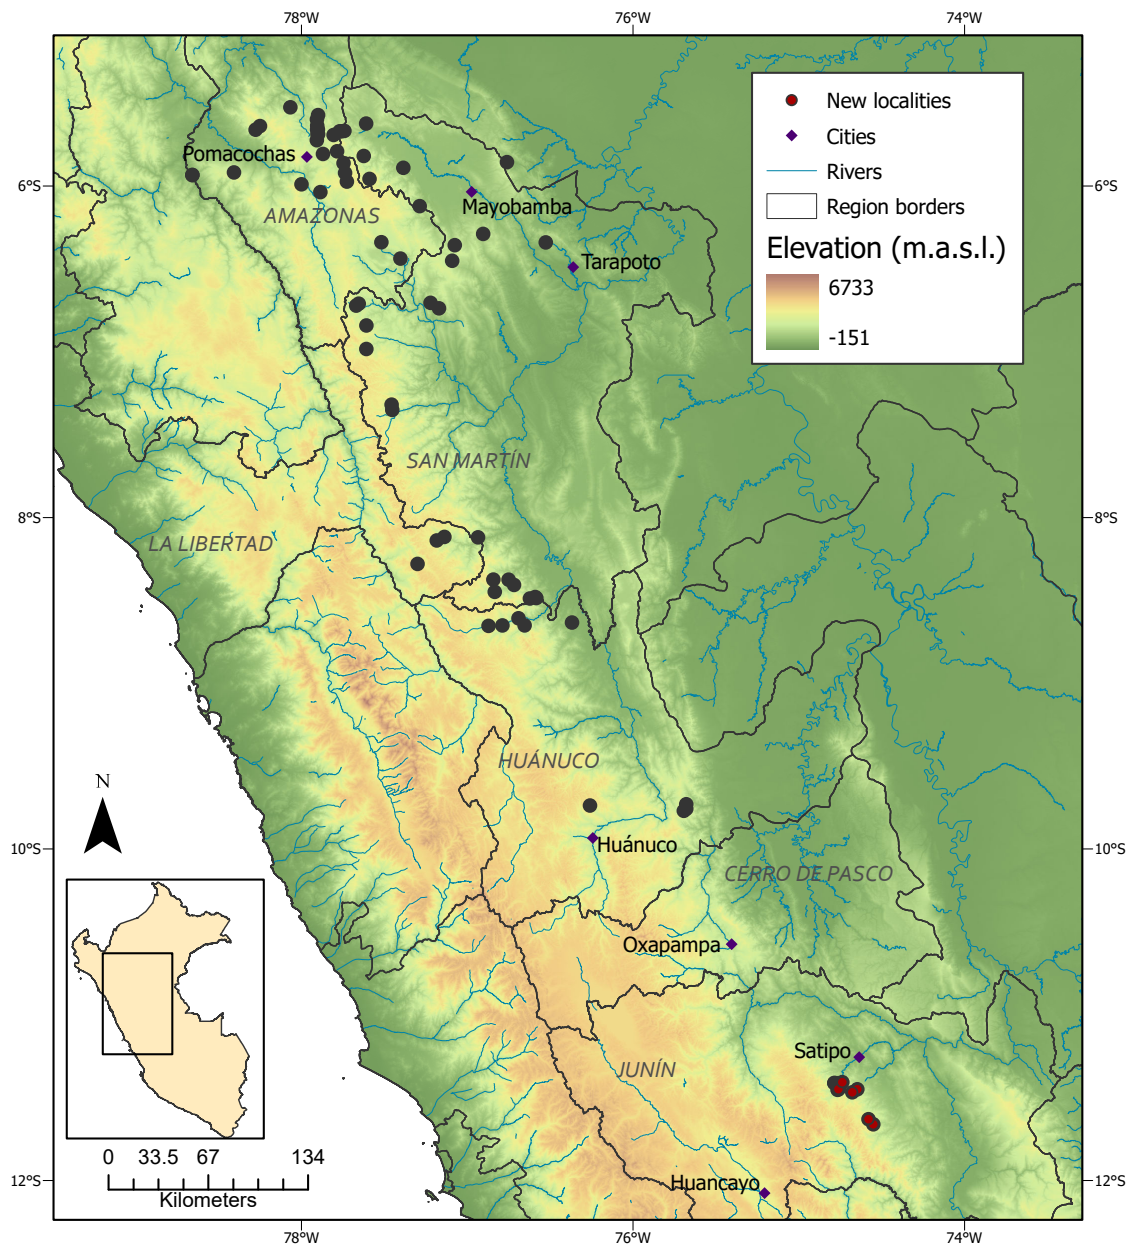

240  
241 **Fig. 1** *Lagothrix flavicauda* occurrences used as presence points in habitat suitability modelling  
242 (HSM) in this study.  
243

## 244 **Results**

### 245 *Population Surveys*

246 In total we surveyed 53 new sites in central and southern Peru. We encountered *L.*  
247 *flavicauda* at 9 of these sites, all to the north of the Mantaro river in Junín (Fig. 2). In surveys south  
248 of this point we did not find any evidence of the species, from our own surveys or from local

249 informants, suggesting a possible southern limit for the species between  $\sim 11.6$  and  $\sim 12^\circ$  south  
 250 (Table 1). We recorded the congeneric Peruvian woolly monkey (*L. lagotricha tschudii*) at 20 sites,  
 251 both north and south of the southern *L. flavicauda* population. At no sites were the species  
 252 sympatric.

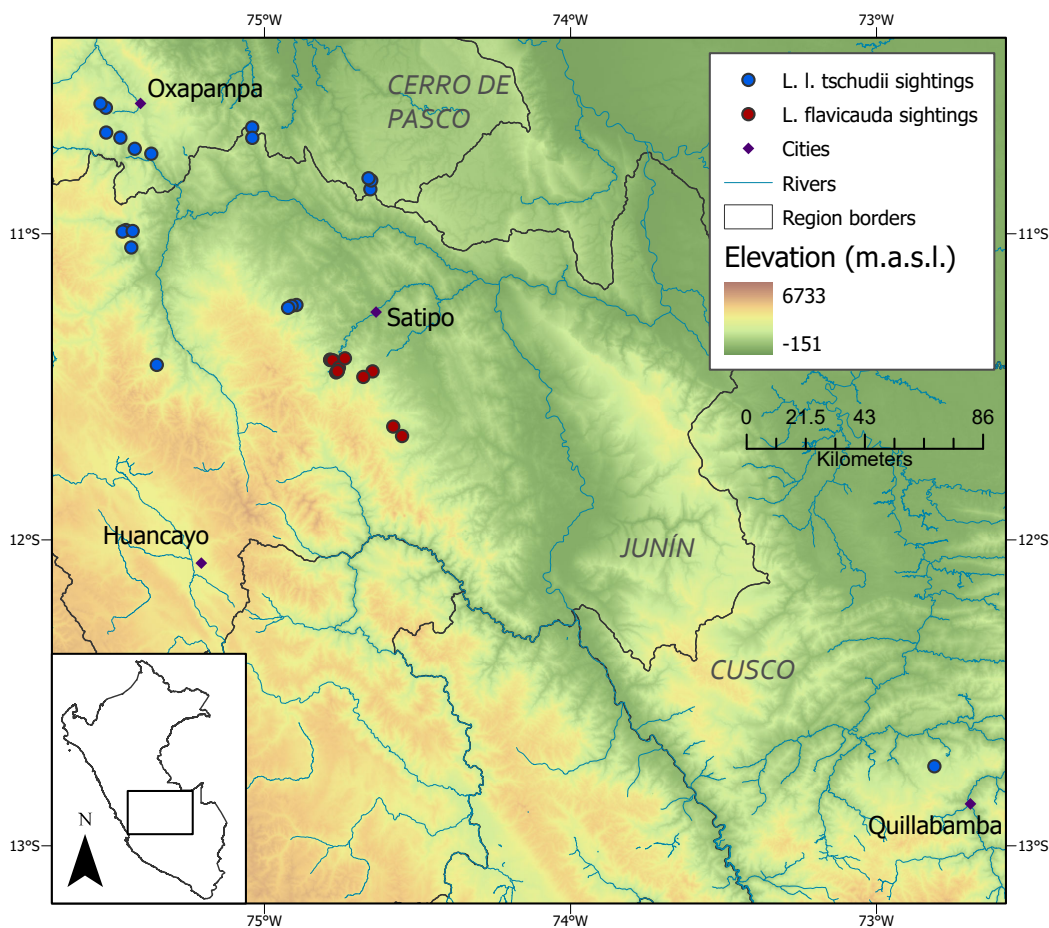

253  
 254 **Fig. 2** Survey results for *L. flavicauda* and *L. lagotricha tschudii*.

255 **Table 1.** Coordinates where *L. flavicauda* and *L. l. tschudii* were found in our surveys.

256

| Region | Species              | Longitude | Latitude | m.a.s.l. |
|--------|----------------------|-----------|----------|----------|
| Junín  | <i>L. flavicauda</i> | -74.7659  | -11.4530 | 2179     |
| Junín  | <i>L. flavicauda</i> | -74.7568  | -11.4378 | 1869     |
| Junín  | <i>L. flavicauda</i> | -74.7609  | -11.4490 | 1866     |
| Junín  | <i>L. flavicauda</i> | -74.6467  | -11.4496 | 1609     |
| Junín  | <i>L. flavicauda</i> | -74.6770  | -11.4678 | 1825     |
| Junín  | <i>L. flavicauda</i> | -74.7609  | -11.4490 | 1866     |
| Junín  | <i>L. flavicauda</i> | -74.5504  | -11.6610 | 2012     |

|       |                       |          |          |      |
|-------|-----------------------|----------|----------|------|
| Junín | <i>L. flavicauda</i>  | -74.5793 | -11.6301 | 2067 |
| Junín | <i>L. flavicauda</i>  | -74.7372 | -11.4069 | 1422 |
| Pasco | <i>L. l. tschudii</i> | -75.4709 | -10.6859 | 1410 |
| Pasco | <i>L. l. tschudii</i> | -75.3698 | -10.7384 | 1257 |
| Pasco | <i>L. l. tschudii</i> | -75.4238 | -10.7223 | 1323 |
| Pasco | <i>L. l. tschudii</i> | -75.5182 | -10.5882 | 1612 |
| Pasco | <i>L. l. tschudii</i> | -75.5358 | -10.5748 | 2088 |
| Pasco | <i>L. l. tschudii</i> | -75.5171 | -10.6693 | 2349 |
| Junín | <i>L. l. tschudii</i> | -75.4529 | -10.9879 | 1771 |
| Junín | <i>L. l. tschudii</i> | -75.4635 | -10.9928 | 2490 |
| Junín | <i>L. l. tschudii</i> | -75.4307 | -10.9911 | 1622 |
| Junín | <i>L. l. tschudii</i> | -75.4352 | -11.0447 | 1672 |
| Junín | <i>L. l. tschudii</i> | -75.3518 | -11.4285 | 2365 |
| Junín | <i>L. l. tschudii</i> | -74.8955 | -11.2327 | 1609 |
| Junín | <i>L. l. tschudii</i> | -74.9112 | -11.2358 | 1795 |
| Junín | <i>L. l. tschudii</i> | -74.9229 | -11.2421 | 1080 |
| Pasco | <i>L. l. tschudii</i> | -74.6540 | -10.8546 | 1465 |
| Pasco | <i>L. l. tschudii</i> | -74.6510 | -10.8259 | 1410 |
| Pasco | <i>L. l. tschudii</i> | -74.6600 | -10.8186 | 1257 |
| Pasco | <i>L. l. tschudii</i> | -75.0401 | -10.6526 | 1323 |
| Pasco | <i>L. l. tschudii</i> | -75.0399 | -10.6866 | 1612 |
| Cusco | <i>L. l. tschudii</i> | -72.8110 | -12.7401 | 1948 |

257

258

### 259 *Species Distribution Modelling*

260           After the multicollinearity reduction, the GLM with the lowest AICc (242) contained  
261 elevation, mean diurnal temperature range, isothermality, precipitation of wettest month,  
262 precipitation seasonality, precipitation of coldest quarter, percent forest cover and VHP as  
263 predictor variables. These were the variables used in both model types. The suitable habitat  
264 predicted by the two models overlapped by 47.5%, with the GLM being more conservative in the  
265 southern regions (Fig. 3).

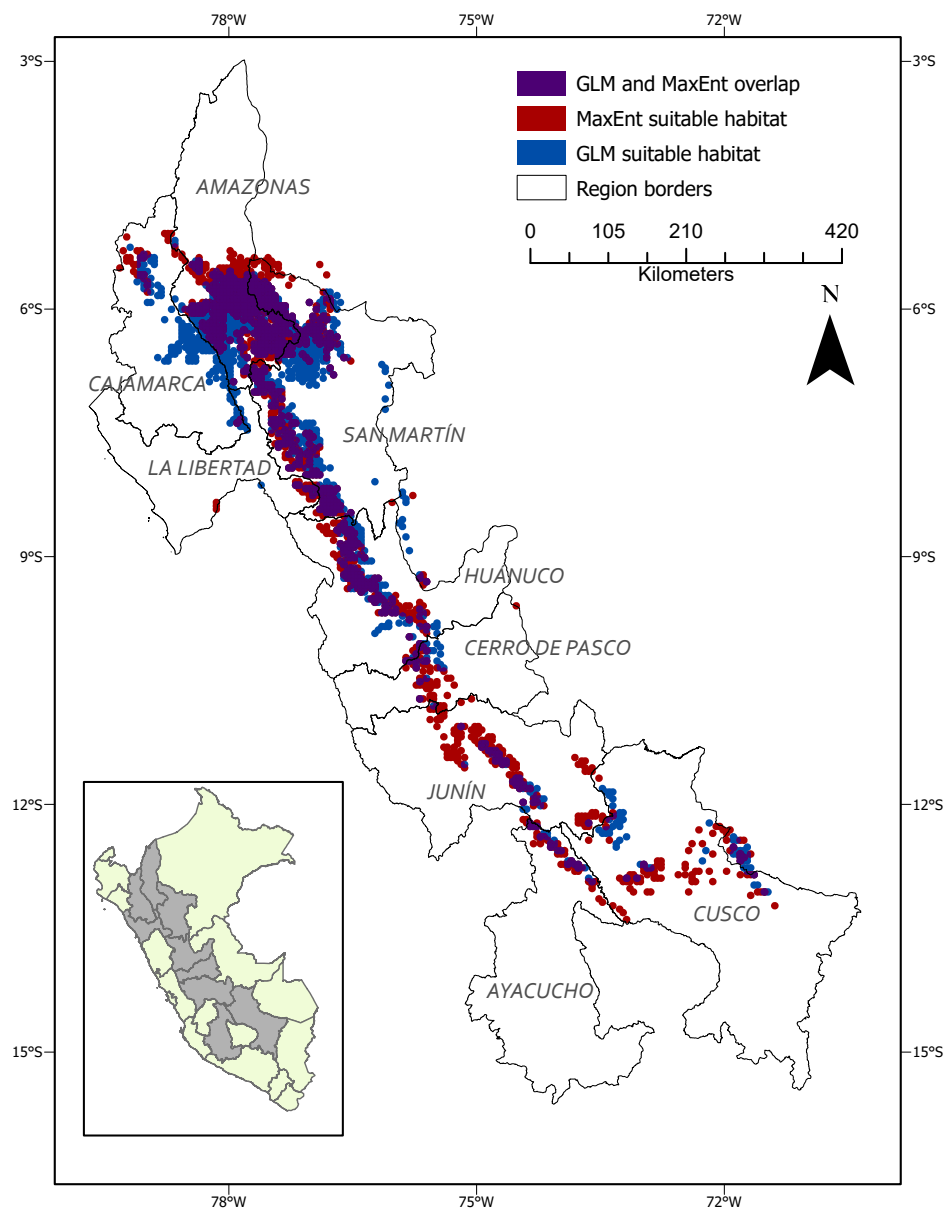

266

267 **Fig 3.** Suitable habitat (Good and Very Good) as indicated by the GLM, MaxEnt model, and their  
268 overlap.

269

270 *Generalized Linear Modelling*

271 The GLM found all predictor variables to be significantly associated with the likelihood of

272 *L. flavicauda* presence with the exceptions of isothermality and forest cover. The variable most

273 highly associated with *L. flavicauda* habitat was precipitation seasonality, which had a negative  
274 relationship. Precipitation of the wettest month had the strongest positive correlation (Table 2).

275 **Table 2.** Correlation coefficients and standard error of residual deviances for each standardized  
276 predictor variable in the GLM. Estimates indicate the average change in the response variable  
277 associate with a one unit increase in the (standardized) predictor variable. Shading indicates  
278 significant association.  
279

| Predictor    | Estimate | Standard Error | P value |
|--------------|----------|----------------|---------|
| Intercept    | -6.228   | 1.008          | <0.0005 |
| Elevation    | -0.768   | 0.249          | 0.00201 |
| Bio2         | 0.983    | 0.466          | 0.0349  |
| Bio3         | 0.616    | 0.327          | 0.0600  |
| bio13        | 1.653    | 0.738          | 0.0251  |
| bio15        | -11.019  | 2.309          | <0.0005 |
| bio19        | -4.831   | 1.107          | <0.0005 |
| Forest Cover | 0.441    | 0.306          | 0.149   |
| VHP          | - 1.256  | 0.247          | <0.0005 |

280  
281 Based on the GLM, 1.4% of the study area was found to be Very Good habitat, and 11.4  
282 % was considered Good (Table 3). Only a very small proportion of remaining habitat was within  
283 the 1 km human settlement buffer (Table 3). Suitable habitats in the southern regions of the *L.*  
284 *flavicauda* range run north-south through central Huánuco and Pasco, but coincide with areas  
285 where the species has been found to be absent, or where *L. l. tschudii* was found instead (this study;  
286 Aquino *et al.* 2017, 2019). In Junín, additional areas of Good habitat are present around and  
287 immediately south of the newly discovered populations. Of all Very Good and Good habitat,  
288 17.72% and 25.95%, respectively, were found to be within Peru's current PA network (Table 3),



289 most of which are in PAs in the northern regions of the study area, while much of the area between  
 290 the northern and Junín populations remains unprotected.

291 A single iteration of the threshold-independent AUC calculation gave an AUC of 0.93 (Fig.  
 292 S1). The bootstrapped evaluation gave a slightly lower mean AUC of 0.89 (95% CI 0.86-0.95).  
 293 Applying the GLM to the training dataset with a 0.4 threshold produced predictions with 81.76%  
 294 accuracy. The model was better able to correctly predict the pseudoabsences (86.36%) than  
 295 presences (59.26%), likely due to the larger amount of pseudoabsence points in the test dataset  
 296 (Table S3). The kappa statistic (0.47) indicated that the model produced predictions in good  
 297 agreement with the test data, though this was not significant ( $p=0.70$ ).

298 **Table 3.** Percentages of the study area that the GLM and MaxEnt model considered to be Very  
 299 Good, Good and unsuitable and the amount of each habitat type within the protected area (PA)  
 300 network in Peru.  
 301

| Modeling Approach | Habitat Suitability | Within Study Region (% of region- before human settlement) | Within Study Region (% of region- after human settlement) | Within PAs (% of habitat) |
|-------------------|---------------------|------------------------------------------------------------|-----------------------------------------------------------|---------------------------|
| GLM               | Unsuitable          | 87.10                                                      | 87.33                                                     | 14.32                     |
|                   | Good                | 11.47                                                      | 11.28                                                     | 25.95                     |
|                   | Very Good           | 1.43                                                       | 1.39                                                      | 17.72                     |
| MaxEnt            | Unsuitable          | 86.01                                                      | 86.2                                                      | 13.79                     |
|                   | Good                | 11.66                                                      | 11.49                                                     | 21.5                      |
|                   | Very Good           | 2.33                                                       | 2.31                                                      | 38.1                      |

302

### 303 *MaxEnt Model*

304 The MaxEnt model corroborated that precipitation seasonality had a strong negative  
 305 correlation with species presence (Table 4). There were some differences in variable importance  
 306 in comparison to the GLM results, including relatively low importance of Precipitation of Coldest

307 Quarter (Table 2). The AUC for the MaxEnt model was 0.95 (Fig. S2) and corroborated by the  
308 mean AUC from bootstrap (0.95; 95% CI 0.93-0.97), indicating greater accuracy than the GLM.

309 The MaxEnt model suggested a higher percentage of Good and Very Good habitats  
310 compared to the GLM (Table 3; Fig. 4a), with percentages minimally effected after removing areas  
311 within the human settlement buffer. Suitable habitat in the southern regions of the study area  
312 included more Good habitat running north to south in Junín (Fig. 4b). Overlaying the PA network  
313 also showed more suitable habitat overall within the network compared to the GLM, with 21.5%  
314 and 38.1% of Good and Very Good being within PAs, respectively (Table 3; Fig. 5a), though much  
315 of the suitable habitat in the southern portion of the species' range remains unprotected (Fig. 5b).

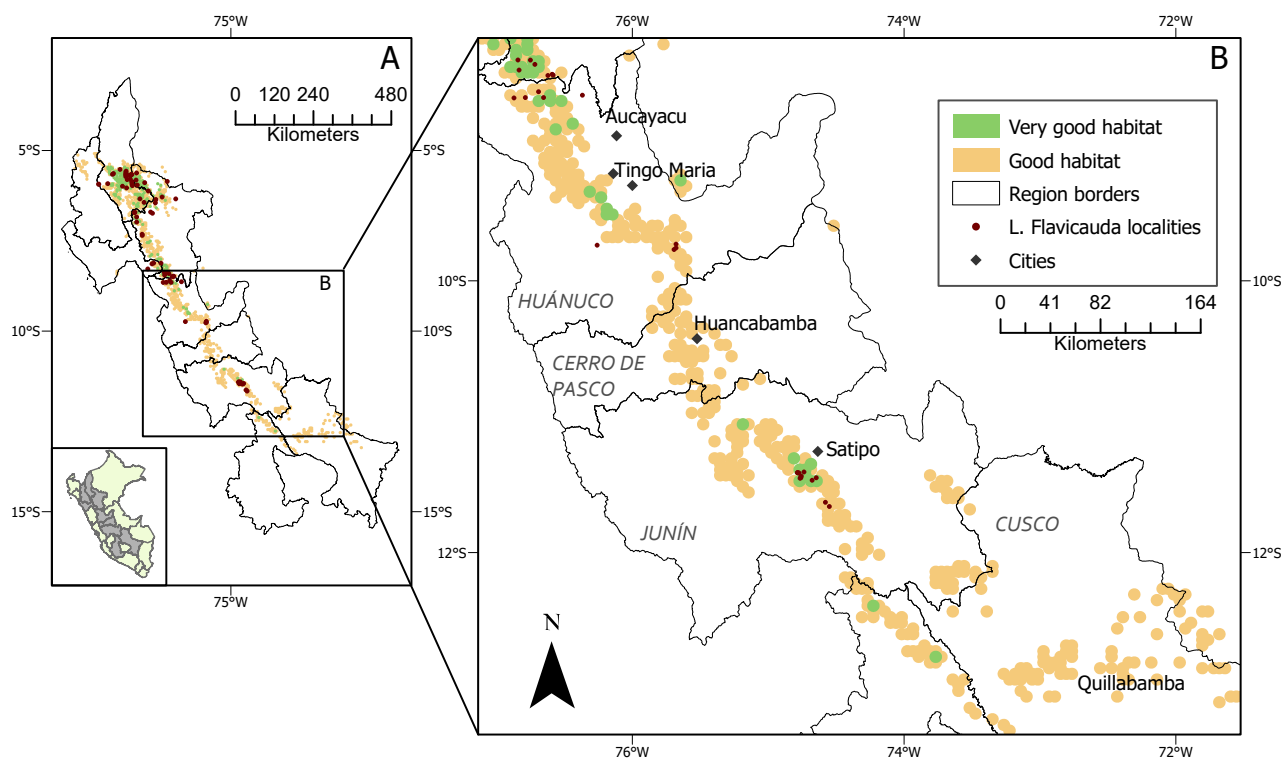

316  
317 **Fig. 4** Habitat suitability maps for *L. flavicauda* as predicted by the MaxEnt model a.)  
318 throughout the described study area and b.) within the regions surrounding the southernmost *L.*  
319 *flavicauda* occurrences.  
320

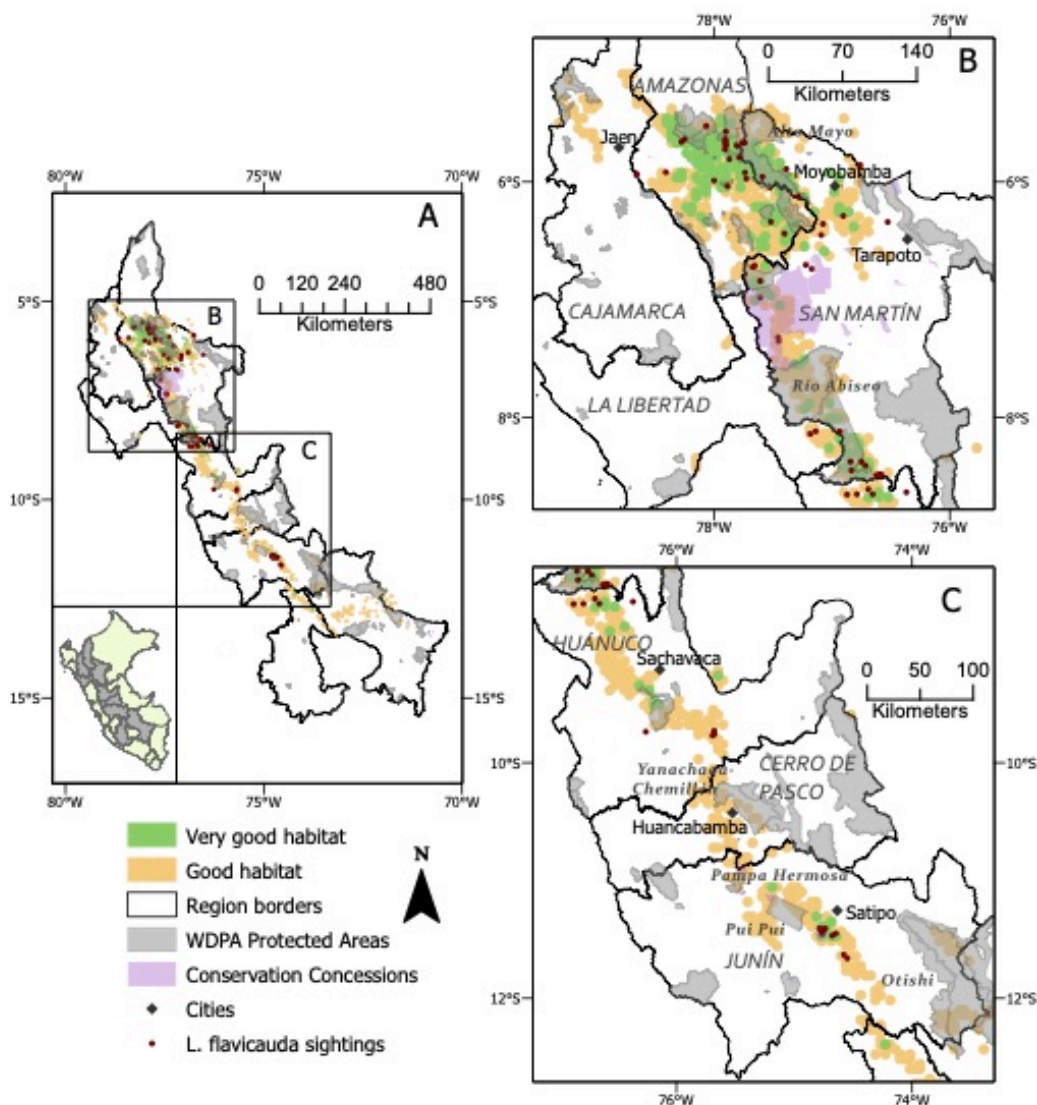

322

323 **Fig. 5** PA network coverage over habitat suitability as predicted by the Maxent model a.) over  
324 the entire study area and b.) within the regions surrounding the southernmost *L. flavicauda*  
325 occurrences

326

## 327 Discussion

328

329 We carried out the first survey of *L. flavicauda* in the recently discovered southern  
330 expansion of its known range (McHugh *et al.* 2020), and our results suggest that this is a very  
331 localized population isolate of the species. Models of suitable habitat including the regions south

332 of Huánuco and our new occurrence records provide important information on the habitat  
333 availability for the species, thereby providing insight into priority areas for focused conservation  
334 efforts and placement of conservation corridors and new protected areas. Our use of free, open-  
335 source modelling platforms will make updating and refining this analysis relatively simple with  
336 the addition of novel presence data. Our updated suitable habitats will hopefully lead to the  
337 discovery of more *L. flavicauda* populations, possibly connecting the northern and southern  
338 distributions.

339 Our surveys discovered multiple new sightings of *L. flavicauda* in central Junín, but only  
340 of *L. l. tschudii* in Cerro de Pasco, northern Junín and northern Cusco, and neither *Lagothrix* taxa  
341 in Ayacucho. The lack of encounters or secondary evidence of *L. flavicauda* in areas with evidence  
342 of *L. l. tschudii* may be due, in large part, to competitive exclusion. *L. l. tschudii* has been found  
343 to be one of the most abundant high-altitude species in previous surveys in Cerro de Pasco and  
344 Huánuco (Aquino *et al.* 2019), and inhabits forests with niche conditions and at elevations suitable  
345 for *L. flavicauda* (Aquino *et al.* 2016; Serrano-Villavicencio *et al.* 2021). When comparing the  
346 suitable habitat in our models with our observations of *L. l. tschudii*, we found that most are in  
347 areas well-suited to the species (Fig. 6), paralleling the work of Aquino *et al.* (2016) which  
348 indicated that *L. flavicauda* occupied similar but separate, higher-altitude habitats than *L. l.*  
349 *tschudii*. While competitive exclusion may explain the replacement of either *Lagothrix* taxa with  
350 its congener, further surveys are needed to rule out possible sympatry in other areas, and to confirm  
351 the absence of both taxa in Ayacucho, with future models incorporating both species.

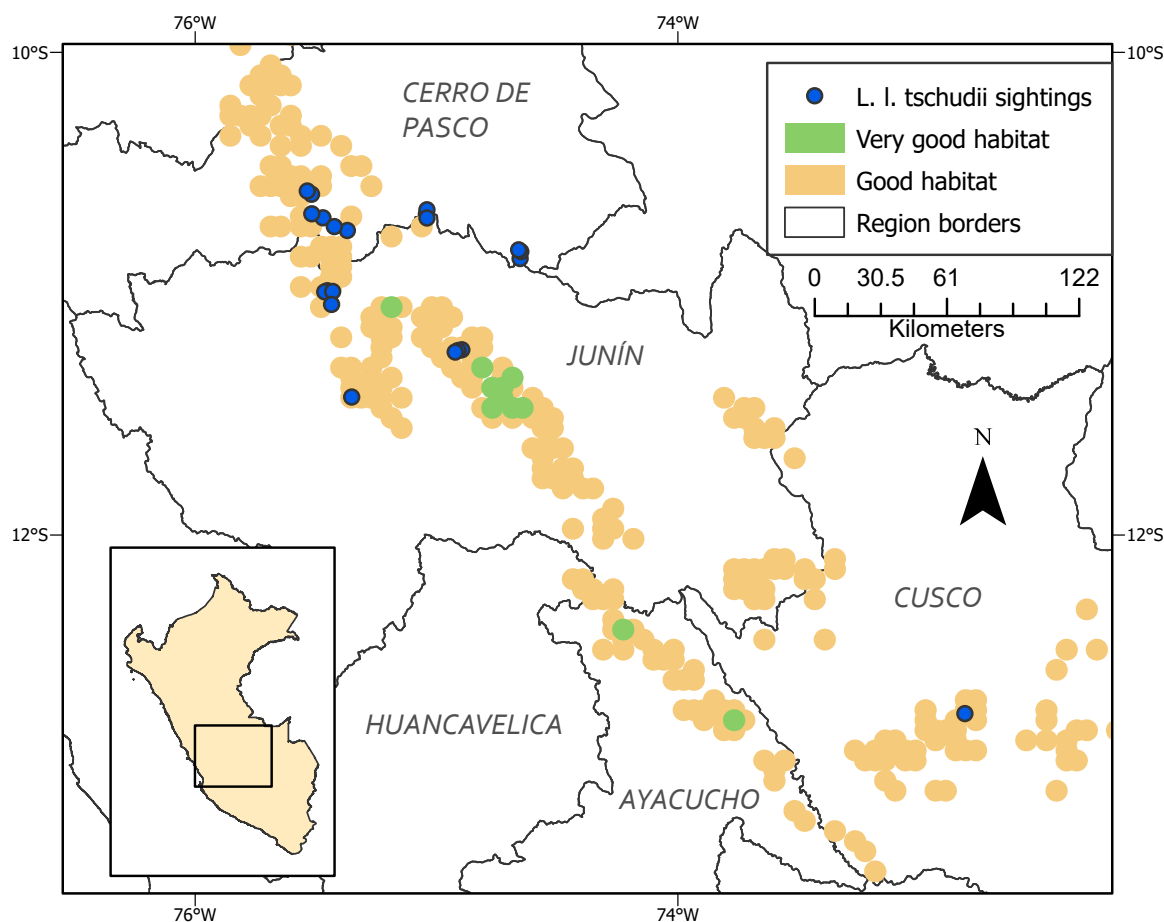

352  
353 **Fig 6** *L. l. tschudii* occurrences compared to suitable habitat predicted by the MaxEnt model. *L.*  
354 *flavicauda* and *L. l. tschudii* were never found occurring at the same site.  
355

356 The lack of *Lagothrix* sightings in Ayacucho does not conclusively confirm absence,  
357 especially in areas where our survey efforts were limited by security issues. Almost 60% of the  
358 areas visited in this region were cultivated for coca (for cocaine production), while the remaining  
359 were small forest patches. More continuous forests did exist, but these were beyond the local  
360 jurisdictions, and controlled by armed guerrilla groups involved in drug trafficking, which we did  
361 not enter, either due to lack of permission or for our safety and that of our guides. Local informants  
362 indicated the presence of “large monkeys,” in these forests, and that they are rarely seen in the  
363 smaller patches. Informants also indicated that these monkeys were more common in previous

364 years, but that hunting by indigenous Ashaninka groups in the area diminished their numbers. This,  
365 with further increases in hunting in combination with deforestation due to coca cultivation likely  
366 contribute to the species' rarity. In the patches we were able to survey in these areas we only  
367 recorded the smaller bodied *Saguinus*, *Saimiri*, and *Cebus*. Finally, some of those interviewed in  
368 the Union Mantara and Vizcatán areas in Junín claimed, based on photographs, to have seen *L.*  
369 *flavicauda* in high elevation areas controlled by guerrilla groups. In particular, they pointed out  
370 the area bordered by the Río Montaro as a place where *L. flavicauda* has definitely been seen.  
371 During interviews, local people who had previously ceased coca cultivation in favour of coffee  
372 and cacao indicated a recent return to coca in the area due to low market prices for legal crops.  
373 This trend could have implications for future surveys and conservation actions.

374 Both of our models showed a strong negative correlation between *L. flavicauda* presence  
375 and precipitation seasonality, consistent with the results of a study by Shanee (2016) in the northern  
376 distribution of the species. This may be due to the phenology of arboreal food sources on which *L.*  
377 *flavicauda* depends. Though the species has been found to use a variety of food resources and plant  
378 parts, studies have shown seasonal shifts in feeding behaviour and dietary components (Shanee  
379 2014; Shanee and Shanee 2011b). Andean species of *Cercropia*, for example, whose fruits and  
380 leaves are commonly consumed by *L. flavicauda* (Shanee 2014), experience annual reproductive  
381 changes due to climatic seasonality (Zalamea *et al.* 2011). Moreover, *L. flavicauda* have  
382 commonly been observed consuming *Ficus* spp. fruit (Leo Luna 1980; Shanee 2014; Almeyda-  
383 Zambrano *et al.* 2019), which have inter- and intra-specific asynchronous fruiting; together with  
384 abundant production, this accounts for the genus' importance for many frugivores (Bronstein *et*  
385 *al.* 1990; Kattan and Valenzuela 2013). Overall, while modelling with bioclimatic variables can

386 aid in determining areas with suitable niche conditions, these models do not provide clear  
387 explanations for a given species' presence or absence.

388 Changing environmental conditions due to current and future climate change, in  
389 combination with increasing anthropogenic impacts in the TABH are predicted to decrease  
390 climatic niche availability and, in turn, species richness of plants (Ramirez-Villegas *et al.* 2014).  
391 These changes will likely lead to further habitat loss and population reductions in *L. flavicauda*  
392 and other primate species (e.g., Shanee 2016). Research suggests that the southern Peruvian Andes  
393 are experiencing a slight decrease in precipitation along with significant increases in surface  
394 temperatures (Vuille *et al.* 2003). Monthly rainfall projections based on fourth report of IPCC  
395 climate change models suggest a significant future increase in rainfall seasonality in the tropical  
396 Andes (Lavado Casimiro *et al.* 2011). Our models suggest that precipitation and seasonality are  
397 among the most important predictors of *L. flavicauda* presence, therefore such changes could have  
398 dire consequences for the species. This is especially true as lower-altitude species migrate to  
399 occupy higher elevations with climate change, increasing competition for resources (Fisher 2011).  
400 Future scenarios are further complicated by the fragmentation of habitats and intervening barriers  
401 to dispersal (Sales *et al.* 2019), which would limit *L. flavicauda*'s ability to colonize new areas.

402 The buffer used to estimate areas as "Low" suitability based on proximity to human  
403 settlement is meant to reflect hunting pressure on *L. flavicauda* (Buckingham and Shanee 2009).  
404 Biodemographic hunting models have been created comparing human population and  
405 demographic data with primate population density to demonstrate the deleterious impact of  
406 hunting on primate "prey" species (Levi *et al.* 2011). Although hunting is known to be one of the  
407 greatest threats to *L. flavicauda* (Shanee 2012), the assumption that there is high hunting pressure  
408 closer to human settlements can be problematic due to differing practices among communities.

409 Conversely, in areas where community conservation initiatives have been enacted, such as the  
410 community of Yambrasbamba in Amazonas, hunting of the species has been largely eliminated  
411 and populations of *L. flavicauda* have increased (Shanee *et al.* 2015). In addition to hunting,  
412 different regions in Peru have varying wildlife trafficking trends and pathways in which primates  
413 are often trafficked as pets or tourist attractions, with large-bodied primates being the most  
414 common victims (Shanee *et al.* 2017). Given this, using pressures from human hunting and  
415 trafficking activity as variables in models like this may require more detailed surveying of local  
416 practices to get a more nuanced representation of localized anthropogenic pressures.

417 While both models showed high statistical accuracies in their predictions, our MaxEnt  
418 model performed better. While the GLM was more conservative in the predicted amount of  
419 suitable habitat in the southern regions, there was a large amount of overlap in predictions between  
420 both models. As with all models, ours are only as accurate as the data used. We were limited by  
421 the relatively low number of localities compared to many other primate habitat suitability models  
422 (Liu *et al.* 2019). Regardless, our model predictions and survey results should encourage the  
423 continuation of surveys in southern Peru to increase presence data and model accuracy for the  
424 species.

425 Overlaying the PA network and the MaxEnt predictions showed that ~75% of suitable  
426 habitat is currently unprotected, with most protection being in the northern regions of the species'  
427 range (Fig. 5c). This is much lower than that of a gap analysis performed in 2009 (Buckingham  
428 and Shanee 2009), likely due to the recent growth of private and communal protected areas, as  
429 well as increases in state parks in the northern regions of the *L. flavicauda* range (Shanee *et al.*  
430 2017; Shanee 2018; Shanee *et al.* 2020). Peru has 18.8% of its land covered by the current PA  
431 network, with 91.7% being within governmental PAs and 8.3% in private or communal PAs



432 (Shanee *et al.* 2020). While national PAs generally cover larger areas, they operate at a regional  
433 scale and rarely give rights or leadership roles to local people (Shanee *et al.* 2017; Horwich *et al.*  
434 2012). The use of protected areas is key for the conservation of *L. flavicauda*, but new state  
435 protected areas can require large areas, free of other land uses, and can take years to formally  
436 create. Private and communal PAs, on the other hand, have proven effective for conservation in  
437 the regions of Amazonas and San Martín where relatively high human population densities limit  
438 opportunities for large state-run PAs (Horwich *et al.* 2012; Shanee *et al.* 2020). In these areas,  
439 local people are the primary decision makers and enforce their own regulations, ensuring that the  
440 methods of protection are in line with the values of their community. The promotion of  
441 communally and privately managed protected areas, particularly in key corridor areas, and  
442 education across landscapes can provide much needed protection (Shanee *et al.* 2015). Further,  
443 conservation concessions cover a great amount of suitable habitat in San Martín (Fig. 5). The  
444 inclusion of the conservation concessions caused the proportion of Very Good habitat within  
445 protected areas to increase from 34.63% to 38.1 %.

446 In the southern portion of the species range, our analysis illustrated that only the small  
447 areas of Pampa Hermosa and Pui Pui cover an area with some suitable *L. flavicauda* habitat near  
448 the southern most populations. As such, the development of PA and community conservation  
449 initiatives in the species' southern distribution are urgently needed, though successful conservation  
450 actions in the areas highlighted here will depend on an understanding of the socioeconomic and  
451 political situation to be able to garner local support (Chazdon *et al.* 2009).

452 Monitoring distributions, gene flow, and habitat suitability is critical to the conservation of  
453 *L. flavicauda*. Future research should use genetic assessments of diversity between the southern  
454 and northern populations of *L. flavicauda* to determine if gene flow is occurring. Patterns of

455 environmental variables should also be analysed between populations to better understand factors  
456 that facilitate migration between populations, and how they could be constrained with climate  
457 change and increasing human development (Sales *et al.* 2019). Using landscape genetic methods  
458 could also determine what landscape and/or ecological features strongly facilitate or hinder gene  
459 flow between populations and be used in planning new PAs or corridors (Olah *et al.* 2016).

460 Further investigation of the home ranges, and resource and land use of *L. flavicauda* will  
461 allow for better interpretation of the importance of SDM predictor variables. Differences in these  
462 attributes between the northern populations and the newly-discovered Junín populations will  
463 specifically indicate the necessary factors a habitat needs to sustain viable populations. This should  
464 involve working with local communities near and within the protected areas containing suitable  
465 habitat in the south, with a particular focus on environmental education as our experience suggests  
466 a lack of understanding of the importance of animals and ecosystem function within many local  
467 immigrant (i.e., non-indigenous) communities. The presence of drug traffickers and armed groups  
468 limited which sites we could visit, particularly in the area of Vizcatán in southern Junín, thus this  
469 area remains un-surveyed, a situation which needs to be urgently rectified once conditions allow.  
470 Further successful surveys will increase the number of presence and absence points for the species,  
471 will allow for more accurate analyses of their environmental needs, and encourage the initiation  
472 of conservation efforts in these areas to continue the growth of both state and private/community  
473 led efforts for *L. flavicauda*. This will also increase the likelihood of finding other high-altitude  
474 primate species localities and help us understand their distributions and conservation needs.

475

476 **Acknowledgements**

477 We thank the local communities we visited for allowing us to survey their surrounding  
478 forests and for their guidance in finding the monkeys. This work was funded by Boston University,  
479 and by Neotropical Primate Conservation thanks to grants from Primate Society of Great Britain,  
480 American Society of Primatologists, International Primatological Society, and Primate  
481 Conservation inc. Field work was carried out under Peruvian research permits (N° 173-2016-  
482 SERFOR-DGGSPFFS, and addendums 213-2016, 350-2017, and 389-2019). We also thank Dr.  
483 Suchi Gopal, who provided guidance in the performance of GIS analyses.

484

## 485 **References**

- 486 Akaike, H. (1973). Information theory and extension of the Maximum Likelihood principle.  
487 *Second International Symposium on Information Theory*, Budapest, Hungary.
- 488 Almeyda-Zambrano, S.L. *et al.* (2019). Habitat preference in the critically endangered yellow  
489 tailed woolly monkey (*Lagothrix flavicauda*) at La Esperanza, Peru. *Am. J. of Primatol.*  
490 81: e23032.
- 491 Allgas, N., Shanee, S., Peralta, A. and Shanee, N. (2014). Yellow-tailed woolly monkey (*Oreonax*  
492 *flavicauda*: Humboldt 1812) Altitudinal Range Extension, Uchiza, Perú. *Neotrop.*  
493 *Primates* 21(2): 207-208.
- 494 Aquino, R., Zárate, R., López, L., García, G. and Charpentier, E. (2015). Current status and threats  
495 to *Lagothrix flavicauda* and other primates in montane forest of the Región Huánuco.  
496 *Primate Conserv.* 29: 1–11.
- 497 Aquino, R., Garcia-Mendoza, G. and Charpentier, E. (2016). Distribution and current status of the  
498 Peruvian yellow-tailed woolly monkey (*Lagothrix flavicauda*) in montane forests of the  
499 Región Huánuco, Peru. *Primate Conserv.* 30: 31-37.

- 500 Aquino, R., García, G., Charpentier, E. and Lòpez, L. (2017). Conservation status of *Lagothrix*  
501 *flavicauda* and other primates in montane forests of San Martín and Huánuco, Peru.  
502 *Rev Peru. Biol.* 24(1): 025-034.
- 503 Aquino, R., Lòpez, L., Falcón, R., Díaz, S. and Gálvez, H. (2019). First inventory of primates in  
504 the montane forests of the Pasco and Ucayali regions, Peruvian Amazon. *Primate Conserv.*  
505 33: 1-11
- 506 Bellamy, C., Scott, C. and Altringham, J. (2013). Multiscale, presence-only habitat suitability  
507 models: fine-resolution maps for eight bat species. *J. Appl. Ecol.* 50: 892-901.
- 508 Blair, M.E. and Melnick, D.J. (2012). Scale-Dependent Effects of a Heterogeneous Landscape  
509 on Genetic Differentiation in the Central American Squirrel Monkey (*Saimiri oerstedii*).  
510 *PLoS ONE* 7(8): e43027.
- 511 Bronstein J.L, Gouyon, P., Gliddon, C., Kjellberg, F. and Michaloud, G. (1990). The ecological  
512 consequences of flowering asynchrony in monoecious figs: a simulation study. *Ecology*  
513 71: 2145-2156.
- 514 Butchart, S. H. M., Barnes R., Davies, C. W. N., Fernández, M. and Seddon, N. (1995)  
515 Threatened mammals of the Cordillera de Colán, Peru. *Oryx* 29 (4):275-281.  
516 doi:doi:10.1017/S003060530002127X
- 517 Brooks, T.M. *et al.* 2002. Habitat loss and extinction in the hotspots of biodiversity.  
518 *Conserv. Biol.* 16(4): 909-923.
- 519 Buckingham, F. and Shanee, S. (2009). Conservation priorities for the Peruvian yellow tailed  
520 woolly monkey (*Oreonax flavicauda*): a GIS risk assessment and gap analysis. *Primate*  
521 *Conserv.* 24: 65–71.
- 522 Case, T.J. and Taper, M.L. (2000). Interspecific competition, environmental gradients, gene

- 523 flow, and the coevolution of species' borders. *Am. Nat.* 155(5), 583-605.
- 524 Calkins, M.T., Beever, E.A., Boykin, K.G., Frey, J.K. and zndersen, M.C. (2012). Not-so-  
525 splendid isolation: modeling climate-mediated range collapse of a montane mammal  
526 *Ochotona princeps* across numerous ecoregions. *Ecography* 35(9), 780-791.
- 527 Chazdon, R.L., Harvey, C.A., Komar, O., Griffith, D.M., Ferguson, B.G., Martínez-Ramos, M.,  
528 Morales, H., Nigh, R., Soto-Pinto, L., Van Breugal, M. and Philpott, S. M. (2009).  
529 Beyond reserves: A research agenda for conserving biodiversity in human-modified  
530 tropical landscapes. *Biotropica* 41(2), 142-153.
- 531 Cianfrani, C., Le Lay, G., Hirzel, A.H. and Loy, A. (2010). Do habitat suitability models  
532 reliably predict the recovery areas of threatened species? *J. Appl. Ecol.* 47: 421-430.  
533 10.1111/j.1365-2664.2010.01781.x
- 534 Dai, Y., Peng, G., Wen, C., Zahoor, B., Ma, X., Hacker, C.E., and Xue, Y. (2021). Climate and  
535 land use changes shift the distribution and dispersal of two umbrella species in the Hindu  
536 Kush Himalayan region. *Sci. Total Environ.* 777, 146207.
- 537 Delêtre, M., Soengas, B., Jai Vidaurre, P., Isela Meneses, R., Delgado Vásquez, O., Oré Balbín,  
538 I., Santayana, M., Heider, B. and Sørensen, M. (2017). Ecotypic differentiation under  
539 farmers' selection: molecular insight into the domestication of *Pachyrhizus* Rich. ex DC.  
540 (Fabaceae) in the Peruvian Andes. *Evol. Appl.* 10(5): 498-513.
- 541 Di Fiore, A. (2004). Diet and feeding ecology of woolly monkeys in a western Amazonian  
542 rainforest. *Int. J. Primatol.* 25: 767-801.
- 543 Dong, X., Chu, X., Huang, Q., Zhang, J. and Bai, W. 2019. Suitable habitat prediction  
544 Sichuan snub-nosed monlkeys (*Rhinopithecus roxellana*) and its implications for  
545 conservation in Baihe Nature Reserve, Sichuan, China. *Environ. Sci. and Pollut. Res.* 26:

- 546 32374-32384. 10.1007/s11356-019-06369-3
- 547 Dormann, C.F. *et al.* (2013). Collinearity: A review of methods to deal with it and a simulation  
548 study evaluating their performance. *Ecography* 36: 027–046.
- 549 Ewers, R.M. and Didham, R.K. (2006). Confounding factors in the detection of species  
550 responses to habitat fragmentation. *Bio. Rev.* 81(1), 117-142.
- 551 Hein, S., Binzenhoefer, B., Poethke, H.J., Biedermann, R., Settele, J. and Schroeder, B. (2007).  
552 The generality of habitat suitability models: A practical test with two insect groups. *Basic*  
553 *Appl. Ecol.* 8(4), 310-320.
- 554 Fack, V., Shanee, S., Vercauteren Drubbel, R., Del Viento, M., Meunier, H. and Vercauteren, M.  
555 (2018). Observation of snake (Colubridae) predation by yellow-tailed woolly monkeys  
556 (*Lagothrix flavicauda*) at El Toro study site, Peru. *Neotrop. Primates* 24 (2):79-81
- 557 Fick, S.E. and Hijmans, R.J. (2017). Worldclim 2: New 1-km spatial resolution climate surfaces  
558 for global land areas. *Int. J. Climatol.* 37(12): 4302-4315.
- 559 Fielding, A.H. and Bell, J.F. (1997). A Review of Methods for the Assessment of Prediction  
560 Errors in Conservation Presence/Absence Models. *Environ. Conserv.* 24: 38-49.
- 561 Fisher, D.O. (2011). Trajectories from extinction: where are missing mammals rediscovered?  
562 *Glob. Ecol. Biogeogr.* 20: 415-425.
- 563 Gallice, G.R., Larrea-Gallegos, G and Vázquez-Rowe, I. (2019). The threat of road expansion in  
564 the Peruvian Amazon. *Onyx* 53(2): 284–292.
- 565 GIZ (2016). Cambio de uso actual de la tierra en la Amazonía peruana: Avances e  
566 implementación en el marco de la Ley Forestal y de Fauna Silvestre 29763. Cooperación  
567 Alemana, Lima, Perú
- 568 Graves, G.R. and O'Neill, J.P (1980). Notes on the yellow-tailed woolly monkey (*Lagothrix*

- 569           flavicauda) of Peru. *J. Mammal.* 61(2):345-357
- 570   Guisan, A., Thuiller, W. and Zimmermann, N.E. (2017). *Habitat Suitability and Distribution*  
571           *Models with Applications in R.* Cambridge University Press, Cambridge, UK.
- 572   Hansen, A.J., Neilson, R.P., Dale, V.H., Flather, C.H., Iverson, L.R., Currie, D.J., Shafer, S.,  
573           Cook, R. and Bartlein, P.J. (2001). Global change in forests: responses of species,  
574           communities, and biomes: interactions between climate change and land use are projected  
575           to cause large shifts in biodiversity. *BioScience* 51(9): 765-779.
- 576   Hansen, M. C. *et al.* (2013). High-Resolution Global Maps of 21<sup>st</sup> Century Forest Cover Change.  
577           *Science* 342: 850–53. Website: [http://earthenginepartners.appspot.com/science-2013-](http://earthenginepartners.appspot.com/science-2013-global-forest)  
578           global-forest. Downloaded February 2020.
- 579   Hijmans, R.J., Phillips, S., Leathwick, J. and Elith, J. (2017). R Package ‘dismo’: Species  
580           Distribution Modeling. Website: <http://rspatial.org/sdm/>. Accessed: February 2020.
- 581   Hijmans, R.J. *et al.* (2020). Package ‘raster’: Geographic data analysis and modeling. Website:  
582           <https://cran.r-project.org/web/packages/raster/raster.pdf>. Accessed: April 2020.
- 583   Hirzel, A.H., Le Lay, G., Helfer, V., Randin, C., and Guisan, A. (2006). Evaluating the ability of  
584           habitat suitability models to predict species presences. *Ecol. Modell.* 199(2), 142-152.
- 585   Horwich, R.H., Lyon, J., Bose, A. and Jones, C.B. (2012). Preserving biodiversity and  
586           ecosystems: catalyzing contagion. In *Deforestation Around the World*: 283–318.  
587           Moutinho, P. (Ed.). Rijeka: InTech.
- 588   Humanitarian OpenStreetMap Team. (2020). United Nations Office for the Coordination of  
589           Humanitarian Affairs. Website: [https://data.humdata.org/dataset/hotosm\\_per\\_buildings](https://data.humdata.org/dataset/hotosm_per_buildings).  
590           Downloaded February 20, 2020.
- 591   Hurvich, C.M. and Tsai, C. (1993). A corrected Akaike information criterion for vector

- 592 autoregressive model selection. *J. Time Ser. Anal.* 14(3): 271-279.
- 593 Kattan, G.H. and Valenzuela, L.A. (2013). Phenology, abundance and consumers of figs (*Ficus*  
594 spp.) in a tropical cloud forest: evaluation of a potential keystone resource. *J. Trop. Ecol.*  
595 29(5): 401-407.
- 596 *Lagothrix flavicauda* (Humboldt, 1812) in GBIF Secretariat (2021). GBIF Backbone Taxonomy.  
597 Checklist dataset <https://doi.org/10.15468/dl.xmcds9> accessed via GBIF.org on 2021-09-  
598 04.
- 599 LaRue, M.A. and Nielsen, C.K. 2008. Modelling potential dispersal corridors for cougars in  
600 midwestern North America using least-cost path methods. *Ecol. Modell.* 212: 372-381.
- 601 Laurance, W. F. (2018). Conservation and the global infrastructure tsunami: Disclose, debate,  
602 delay!. *Trends Ecol. Evol.* 33(8), 568-571.
- 603 Lavado Casimiro, W.S., Labat, D., Guyot, J.L. and Ardoin-Bardin, S. (2011). Assessment of  
604 climate change impacts on the hydrology of the Peruvian Amazon-Andes basin. *Hydrol.*  
605 *Process.* 25: 3721-3734.
- 606 Leo Luna, M. (1980). First field study of the yellow-tailed woolly monkey. *Oryx* 15: 386-389.
- 607 Levi, T., Shepard, G.H., Ohl-Schacherer, J., Wilmer, C. C., Peres, C. A. and Yu, D. W. (2011).  
608 Spatial tools for modeling the sustainability of subsistence hunting in tropical forests. *Ecol.*  
609 *Appl.* 21(5): 1802-1818.
- 610 Liu, J., Fitzgerald, M., Liao, H., Luo, Y., Jin, Y., Li, X., Yang, X., Hirata, S. and Matsuzawa, T.  
611 (2019). Modeling habitat suitability for Yunnan snub-nosed monkeys in Laojun Mountain  
612 National Park. *Primates* 10.1007/s10329-01900776-3
- 613 McHugh, S.M., F.M. Cornejo, J. McKibben, M.Zarate, T.Carlos, C.F. Jiménez and



- 614 C.A. Schmitt. (2020). First detection and updated geographic range of the Peruvian yellow-  
615 tailed woolly monkey (*Lagothrix flavicauda*) in the region Junín, Peru. *Oryx* 54(6): 814-  
616 818. DOI: 0.1017/S003060531900084X.
- 617 Mittermeier R.A, de Macedo-Ruiz, H, Luscombe, A (1975). A woolly monkey rediscovered in  
618 Peru. *Oryx* 13 (1):41-46
- 619 Newbold, T. *et al.* (2014). A global model of the response of tropical and sub-tropical forest  
620 biodiversity to anthropogenic pressures. *Proc. R. Soc. B: Biol. Sci.* 281(1792), 20141371
- 621 NOAA (National Oceanic and Atmospheric Administration). 2020. Climate Prediction Center.  
622 Website:[https://www.cpc.ncep.noaa.gov/products/assessments/assess\\_97/samer.html](https://www.cpc.ncep.noaa.gov/products/assessments/assess_97/samer.html).  
623 Accessed: June 2020.
- 624 Olah, G., Smith, A.L., Asner, G.P., Brightsmith, D.J., Heinsohn, R.G. and Peakall, R. (2017).  
625 Exploring dispersal barriers using landscape genetic resistance modelling in scarlet  
626 macaws of the Peruvian Amazon. *Landsc. Ecol.* 32: 445-456.
- 627 Oliveira, P.J.C., Asner, G.P., Knapp, D.E., Almeyda, A., Galván-Gildemeister, R., Keene, S.,  
628 Raybin, R.F., Smith, R.C. (2007). Land-Use Allocation Protects the Peruvian Amazon.  
629 *Science* 317 (5842):1233. doi:10.1126/science.1146324
- 630 Parker, T.A and Barkley, L.J (1981). New locality for the yellow-tailed woolly monkey. *Oryx* 16  
631 (1):71-71
- 632 Pásztor, L., Barabás, G. and Meszéna, G. (2020). Competitive Exclusion and Evolution:  
633 Convergence Almost Never Produces Ecologically Equivalent Species: (A Comment on  
634 McPeck, “Limiting Similarity? The Ecological Dynamics of Natural Selection among  
635 Resources and Consumers Caused by Both Apparent and Resource Competition”). *Am.*  
636 *Nat.* 195(4), E112-E117.

- 637 Patterson, B.D. and López Wong, C. (2014) Mamíferos/Mammals. In *Peru: Cordillera Escalera.*  
638 *Rapid Biological Inventories Report 26:* 154-167. Pitman, N *et al.* (Ed.). Chicago: The  
639 Field Museum.
- 640 Phillips, S., Anderson, R.P. and Schapire, R.E. (2006). Maximum entropy modeling of species  
641 geographic distributions. *Ecol. Modell.* 190(3-4): 231-259.
- 642 Phillips, S.J., Dudík, M., Elith, J., Graham, C. H., Lehmann, A., Leathwick, J., Ferrier, S. (2009).  
643 Sample selection bias and presence-only distribution models: implications for background  
644 and pseudo-absence data. *Ecol. Appl.* 19: 181–197.
- 645 Programa Bosques (2015) Bosque - no bosque y pérdida de bosque Húmedo Amazónico 2000-  
646 2014. Programa Nacional de Conservación de Bosques para la Mitigación del Cambio  
647 Climático, Lima, Peru.
- 648 R Core Team. (2018). R: A language and environment for statistical computing. R Foundation for  
649 Statistical Computing, Vienna, Austria. Website: <https://www.Rproject.org/>.
- 650 Ramirez-Villegas, J., Cuesta, F., Devenish, C., Peralvo, M., Jarvis, A. and Arnillas, C.A. (2014).  
651 Using species distribution models for designing conservation strategies of Tropical Andean  
652 biodiversity under climate change. *J. Nat. Conserv.* 22: 391-404.
- 653 Robillard, C.M., Cristine, L.E., Soares, R.N. and Kerr, J.T. (2015). Facilitating climate-change-  
654 induced range shifts across continental land-use barriers. *Conserv. Biol.* 29(6), 1586-  
655 1595.
- 656 Rodriguez, E., Morris, C.S., Belz, J.E., Chapin, E.C., Martin, J.M., Daffer, W., and Hensley, S.  
657 (2005). An assessment of the SRTM topographic products, Technical Report JPL D-31639.  
658 *Jet Propulsion Laboratory*, pp 143. Pasadena, California. Website:  
659 <http://srtm.csi.cgiar.org/srtmdata/>. Downloaded February 2020.

- 660 Sales, L.P., Ribeiro, B.R., Pires, M.M., Chapman, C.A. and Loyola, R. (2019). Recalculating  
661 route: dispersal constraints will drive the redistribution of Amazon primates in the  
662 Anthropocene. *Ecography* 42: 1789-1801.
- 663 Serrano-Villavicencio, J.E., Shanee, S. and Pacheco, V. (2021). *Lagothrix flavicauda* (Primates:  
664 Atelidae). *Mamm. Species* 53(1010) 134-144. DOI: 10.1093/mspecies/seab013
- 665 Shanee, N., Shanee, S. and Maldonado, A.M. (2007). Conservation assessment and planning for  
666 the yellow-tailed woolly monkey (*Oreonax flavicauda*) in Peru. *Wildlife Biol.* 3: 73-82.
- 667 Shanee, S. and Shanee, N. (2009). A new conservation NGO, neotropical primate conservation:  
668 project experiences in Perú. *Int. NGO J.* 4(7): 329-332.
- 669 Shanee, S. (2011). Distribution survey and threat assessment of the yellow-tailed woolly  
670 monkey (*Oreonax flavicauda*; Humboldt 1812), northeastern Peru. *Int. J. Primatol.* 32:  
671 691-707.
- 672 Shanee, S. and Shanee N. (2011a). Population density estimates for the critically endangered  
673 yellow-tailed woolly monkey (*Lagothrix flavicauda*) at La Esperanza, northeastern Peru.  
674 *Int. J. Primatol.* 32: 691-180.
- 675 Shanee, S. and Shanee, N. (2011b). Activity budget and behavioural patterns of free-ranging  
676 yellow-tailed woolly monkeys *Oreonax flavicauda* (Mammalia: Primates), at La  
677 Esperanza, northeastern Peru. *Contrib. Zool.* 80:269–277.
- 678 Shanee, N. (2012) Trends in local wildlife hunting, trade and control in the Tropical Andes  
679 Hotspot, Northeastern Peru. *Endangered Species Research* 19 (2):177-186
- 680 Shanee, S. (2014). Ranging behaviour, daily path lengths, diet and habitat use of yellow tailed

- 681 woolly monkeys (*Oreonax flavicauda*) at La Esperanza, Peru. In *The woolly monkey:*  
682 *behaviour, ecology, conservation and systematics*: 167–186. Defler, T. R and P. R.  
683 Stevenson (Ed.). New York: Springer Verlag.
- 684 Shanee, N., Shanee, S. and Horwich, R.H. (2015). Effectiveness of locally run conservation  
685 initiatives in north-east Peru. *Oryx* 49(2): 239-247.
- 686 Shanee, S. and Shanee, N. (2015). Measuring success in a community conservation project:  
687 local population increase in a critically endangered primate, the yellow-tailed woolly  
688 monkey (*Lagothrix flavicauda*) at La Esperanza, northeastern Peru. *Trop. Conserv. Sci.*  
689 8(1): 169-186.
- 690 Shanee, S. (2016). Predicting Future Effects of Multiple Drivers of Extinction Risk in Peru’s  
691 Endemic Primate Fauna. In *Ethnoprimatology, Developments in Primatology, Progress*  
692 *and Prospects*: 315–349. Waller, M. T. (Ed.), Switzerland: Springer International  
693 Publishing.
- 694 Shanee, N. and Shanee, S. (2016). Land trafficking, migration and conservation in the “No Man’s  
695 Land” of northeastern Peru. *Trop. Conserv. Sci.* 9(4): 1-16.
- 696 Shanee, N., Mendoza, A.P. and Shanee, S. (2017). Diagnostic overview of the illegal trade in  
697 primates and law enforcement in Peru. *Am. J. Primatol.* 79 (11): e22516.  
698 doi:10.1002/ajp.22516
- 699 Shanee, S., Shanee, N., Monteferri, B., Allgas, N., Pardo, A.A. and Horwich, R.H. (2017).  
700 Protected area coverage of threatened vertebrates and ecoregions in Peru: Comparison of  
701 communal, private and state reserves. *J. Environ. Manage.* 202, 12–20.

- 702 Shanee, S. Allgas, N. and Shanee, N. (2018). Community conservation as a tool for primate  
703 conservation in Peru. In *Primatology, Biocultural Diversity and Sustainable*  
704 *Development in Tropical Forests*: 320-329. Rommens, D. and J. Pulido Mata (Ed.).  
705 Mexico: UNESCO.
- 706 Shanee, S., Shanee, N., Lock, W. and Espejo-Uribe, M.J. (2020). The development and growth of  
707 non-governmental conservation in Peru: Privately and communally protected areas.  
708 *Hum. Ecol.* 48: 681-693.
- 709 Shanee, S., Cornejo, F.M., Aquino, R., Mittermeier, R.A. & Vermeer, J. (2021). *Lagothrix*  
710 *flavicauda* (amended version of 2019 assessment). *The IUCN Red List of Threatened*  
711 *Species* 2021: e.T39924A192307818. [https://dx.doi.org/10.2305/IUCN.UK.2021-](https://dx.doi.org/10.2305/IUCN.UK.2021-1.RLTS.T39924A192307818.en)  
712 [1.RLTS.T39924A192307818.en](https://dx.doi.org/10.2305/IUCN.UK.2021-1.RLTS.T39924A192307818.en). Accessed on 31 January 2022.
- 713 Solórzano-García, B., Zubillaga, D., Piñero, D. and Vázquez-Domínguez, E. (2021).  
714 Conservation implications of living in forest remnants: inbreeding and genetic structure  
715 of the northernmost mantled howler monkeys. *Biotropica* 53(4), 1163-1177.
- 716 Strier, K.N. (1992). Atelinae adaptations: behavioral strategies and ecological constraints. *Am. J.*  
717 *Phys. Anthropol.* 88: 515-524.
- 718 UNEP-WCMC. 2020. Protected Area Profile for Peru from the World Database of Protected  
719 Areas, June 2020. Available at: [www.protectedplanet.net](http://www.protectedplanet.net)
- 720 Vermote, E. (2019). NOAA CDR Program. NOAA Climate Data Record (CDR) of AVHRR  
721 Normalized Difference Vegetation Index (NDVI), Version 5. Vegetation Health Product.  
722 NOAA National Centers for Environmental Information.  
723 <https://doi.org/10.7289/V5ZG6QH9>. Downloaded May 20, 2020.
- 724 Vuille, M., Bradley, R.S., Werner, M. and Keimig, F. (2003). 20th century climate change in the

- 725 Tropical Andes: observations and model results. In *Variability and Change in High*  
726 *Elevation Regions: Past, Present & Future. Advances in Global Change Research, vol 15:*  
727 *75-99.* Diaz, H. F. (Ed.). Dordrecht: Springer.
- 728 Xiao, H., McDonald-Madden, E., Sabbadin, R., Peyrard, N., Dee, L. E. and Chadès, I. (2019).  
729 The value of understanding feedbacks from ecosystem functions to species for managing  
730 ecosystems. *Nat. Comm.* 10(1), 1-10.
- 731 Young, K.R. (1996). Threats to biological diversity caused by coca/cocaine deforestation in  
732 Peru. *Environ. Conserv.* 23 (1):7-15. doi:doi:10.1017/S0376892900038200
- 733 Zalamea, P., Munoz, F., Stevenson, P.R., Paine, C.E.T., Sarmiento, C., Sabatier, D. and Heuret,  
734 P. (2011). Continental-scale patterns of *Cecropia* reproductive phenology: evidence from  
735 herbarium specimens. *Proceedings of the Royal Society B* 278: 2437-2445.
